# Supplementary material for: Protein Palmitoylation in Bovine Ovarian Follicle
Source: MDPI journal article supplement (doi:10.3390/ijms222111757), 2021-10-29
Supplement: s1 [file s1]

## Supplementary data

**Supplementary data Table S1.** Gene expression of follicular palmitoyl-proteins in bovine granulosa cell, cumulus cells and oocyte, using microarray hybridization. Mean values of relative expression of four independent samples are shown for each gene. Different letters signify difference at  $p < 0.05$ .

| Gene           | p-value | Granulosa<br>cells | Cumulus<br>cells | Oocyte      |
|----------------|---------|--------------------|------------------|-------------|
| <i>ACAA2</i>   | 0.001   | 34.463 (a)         | 27.766 (a)       | 68.459 (b)  |
| <i>ACAT1</i>   | 0.000   | 105.594 (b)        | 106.047 (b)      | 24.086 (a)  |
| <i>AIFM1</i>   | 0.000   | 19.503 (a)         | 25.845 (a)       | 57.509 (b)  |
| <i>ALDH6A1</i> | 0.000   | 0.703 (b)          | 0.672 (b)        | 0.331 (a)   |
| <i>APMAP</i>   | 0.000   | 12.230 (b)         | 23.661 (c)       | 1.428 (a)   |
| <i>ATP1A1</i>  | 0.011   | 16.332 (a)         | 30.850 (b)       | 22.919 (ab) |
| <i>BLVRA</i>   | 0.000   | 75.982 (b)         | 130.174 (c)      | 1.068 (a)   |
| <i>CANX</i>    | 0.003   | 233.852 (ab)       | 318.600 (b)      | 153.760 (a) |
| <i>CD36</i>    | 0.013   | 27.198 (b)         | 15.528 (ab)      | 3.883 (a)   |
| <i>CD58</i>    | 0.000   | 1.949 (a)          | 2.501 (a)        | 53.007 (b)  |
| <i>CD81</i>    | 0.773   | 13.256 (a)         | 18.177 (a)       | 22.398 (a)  |
| <i>CKAP4</i>   | 0.030   | 674.865 (ab)       | 792.857 (b)      | 383.658 (a) |
| <i>CLGN</i>    | 0.008   | 24.413 (b)         | 9.976 (a)        | 16.893 (ab) |
| <i>CRELD1</i>  | 0.000   | 13.658 (b)         | 31.393 (c)       | 5.100 (a)   |
| <i>CTNND1</i>  | 0.000   | 1.212 (a)          | 1.623 (a)        | 7.354 (b)   |
| <i>DNAJC5</i>  | 0.000   | 3.799 (a)          | 3.958 (a)        | 7.958 (b)   |
| <i>ECE1</i>    | 0.000   | 2.378 (b)          | 3.327 (c)        | 0.545 (a)   |
| <i>EPHX1</i>   | 0.001   | 15.094 (a)         | 21.737 (b)       | 9.158 (a)   |
| <i>ERGIC3</i>  | 0.000   | 248.992 (b)        | 339.813 (c)      | 34.344 (a)  |
| <i>ERP44</i>   | 0.000   | 49.605 (a)         | 63.439 (a)       | 173.210 (b) |
| <i>FASN</i>    | 0.185   | 2.873 (a)          | 5.059 (a)        | 1.019 (a)   |
| <i>GALNT1</i>  | 0.000   | 3.352 (a)          | 3.368 (a)        | 14.884 (b)  |
| <i>GLG1</i>    | 0.000   | 34.213 (a)         | 76.984 (b)       | 24.007 (a)  |
| <i>GNA11</i>   | 0.000   | 27.050 (a)         | 41.322 (a)       | 182.958 (b) |
| <i>GNA13</i>   | 0.000   | 0.811 (a)          | 0.954 (a)        | 3.615 (b)   |
| <i>GNAI1</i>   | 0.000   | 1.357 (a)          | 1.169 (a)        | 14.376 (b)  |
| <i>GNAS</i>    | 0.000   | 218.021 (b)        | 248.977 (b)      | 3.486 (a)   |
| <i>HSD17B1</i> | 0.000   | 873.825 (b)        | 2188 (c)         | 38.566 (a)  |
| <i>IDH2</i>    | 0.000   | 77.683 (b)         | 64.868 (b)       | 6.077 (a)   |
| <i>IGSF8</i>   | 0.000   | 4.317 (b)          | 10.195 (c)       | 0.559 (a)   |
| <i>IMMT</i>    | 0.012   | 26.704 (a)         | 42.418 (b)       | 39.348 (b)  |
| <i>ITGA6</i>   | 0.000   | 5.936 (b)          | 6.641 (b)        | 1.496 (a)   |
| <i>LDHC</i>    | 0.000   | 0.726 (a)          | 0.719 (a)        | 95.821 (b)  |
| <i>LMAN1</i>   | 0.008   | 9.436 (b)          | 11.057 (b)       | 4.985 (a)   |
| <i>LSR</i>     | 0.000   | 16.312 (a)         | 23.688 (b)       | 38.136 (c)  |
| <i>M6PR</i>    | 0.002   | 28.837 (a)         | 32.502 (a)       | 43.498 (b)  |
| <i>MAN1B1</i>  | 0.004   | 3.153 (ab)         | 6.186 (b)        | 0.751 (a)   |
| <i>MBLAC2</i>  | 0.000   | 2.111 (b)          | 1.956 (b)        | 0.262 (a)   |
| <i>MLEC</i>    | 0.000   | 9.927 (a)          | 11.466 (a)       | 46.329 (b)  |

|                 |       |              |             |             |
|-----------------|-------|--------------|-------------|-------------|
| <i>MMP14</i>    | 0.004 | 1.067 (b)    | 0.882 (b)   | 0.452 (a)   |
| <i>MYOF</i>     | 0.000 | 134.738 (b)  | 144.418 (b) | 6.644 (a)   |
| <i>NNT</i>      | 0.000 | 12.801 (b)   | 15.948 (b)  | 6.131 (a)   |
| <i>OAT</i>      | 0.003 | 153.988 (a)  | 295.524 (b) | 338.588 (b) |
| <i>PGK1</i>     | 0.000 | 344.460 (b)  | 853.946 (c) | 35.570 (a)  |
| <i>PHB</i>      | 0.037 | 20.212 (ab)  | 19.049 (a)  | 37.398 (b)  |
| <i>PI4K2A</i>   | 0.000 | 0.509 (a)    | 0.578 (a)   | 0.930 (b)   |
| <i>PLOD1</i>    | 0.000 | 4.076 (b)    | 21.899 (c)  | 0.290 (a)   |
| <i>PLSCR2</i>   | 0.000 | 27.211 (b)   | 28.326 (b)  | 7.993 (a)   |
| <i>PLSCR3</i>   | 0.018 | 28.339 (a)   | 32.621 (ab) | 37.168 (b)  |
| <i>PLXNB2</i>   | 0.000 | 64.740 (b)   | 86.194 (c)  | 5.360 (a)   |
| <i>PRAF2</i>    | 0.000 | 56.951 (b)   | 83.633 (b)  | 1.923 (a)   |
| <i>PRDX6</i>    | 0.001 | 67.287 (b)   | 61.864 (b)  | 36.694 (a)  |
| <i>PTBP1</i>    | 0.000 | 131.658 (a)  | 175.859 (a) | 330.625 (b) |
| <i>PTGFRN</i>   | 0.000 | 3.610 (b)    | 7.312 (c)   | 0.624 (a)   |
| <i>RAP2A</i>    | 0.005 | 13.443 (ab)  | 17.690 (b)  | 9.237 (a)   |
| <i>ROR2</i>     | 0.000 | 59.187 (b)   | 129.995 (c) | 1.403 (a)   |
| <i>RPN2</i>     | 0.001 | 110.448 (b)  | 144.970 (b) | 37.114 (a)  |
| <i>S100A8</i>   | 0.001 | 1.271 (b)    | 0.584 (a)   | 0.244 (a)   |
| <i>S100A9</i>   | 0.000 | 0.666 (c)    | 0.501 (b)   | 0.246 (a)   |
| <i>SCAMP2</i>   | 0.000 | 37.678 (a)   | 49.152 (a)  | 113.639 (b) |
| <i>SCAMP3</i>   | 0.000 | 126.553 (a)  | 154.982 (a) | 385.571 (b) |
| <i>SCARB2</i>   | 0.000 | 576.420 (b)  | 578.115 (b) | 29.324 (a)  |
| <i>SCCPDH</i>   | 0.004 | 2.562 (a)    | 2.572 (a)   | 4.078 (b)   |
| <i>SELENBP1</i> | 0.000 | 2.442 (a)    | 1.445 (a)   | 179.307 (b) |
| <i>SERPINH1</i> | 0.000 | 136.620 (b)  | 222.703 (c) | 1.088 (a)   |
| <i>SIGMAR1</i>  | 0.006 | 102.168 (ab) | 152.670 (b) | 65.402 (a)  |
| <i>SLC44A1</i>  | 0.000 | 0.530 (b)    | 0.540 (b)   | 0.306 (a)   |
| <i>SORT1</i>    | 0.000 | 1.795 (b)    | 3.318 (c)   | 0.834 (a)   |
| <i>STRA6</i>    | 0.000 | 1164 (b)     | 2488 (c)    | 23.725 (a)  |
| <i>TMX1</i>     | 0.003 | 17.581 (b)   | 16.391 (b)  | 8.296 (a)   |
| <i>TMX3</i>     | 0.000 | 1.835 (a)    | 1.638 (a)   | 6.749 (b)   |
| <i>TMX4</i>     | 0.000 | 3.594 (b)    | 3.952 (b)   | 1.233 (a)   |
| <i>TUBB4B</i>   | 0.003 | 613.015 (a)  | 1101 (ab)   | 1528 (b)    |
| <i>TUFM</i>     | 0.000 | 150.854 (a)  | 184.109 (a) | 383.048 (b) |
| <i>VAMP3</i>    | 0.000 | 92.392 (a)   | 104.297 (a) | 284.722 (b) |
| <i>VIM</i>      | 0.000 | 913.989 (b)  | 1235 (c)    | 7.346 (a)   |

**Supplementary data Table S2.** Expression of the enzymes involved in protein palmitoylation (GO:0018345) and depalmitoylation (GO:0002084, marked **in bold**) in bovine oocytes (Oo), cumulus cells (CC) and granulosa cells (GC) using microarray hybridisation. Mean values of relative expression of four independent samples are shown for each gene. Different letters signify difference at  $p < 0.05$ .

| Gene           | Gene/product name                                         | <i>p</i> -value | Relative expression |           |            |
|----------------|-----------------------------------------------------------|-----------------|---------------------|-----------|------------|
|                |                                                           |                 | Oo                  | CC        | GR         |
| <b>ABHD12</b>  | <b>Lysophosphatidylserine lipase ABHD12</b>               | 0.51            | 112.1 (a)           | 186.5 (a) | 184.2 (a)  |
| <b>ABHD13</b>  | <b>Protein ABHD13</b>                                     | <0.01           | 1.2 (a)             | 4.7 (c)   | 4.0 (b)    |
| <b>ABHD17A</b> | <b>Alpha/beta hydrolase domain-containing protein 17A</b> | 0.171           | 84.9 (a)            | 27.9 (a)  | 23.526 (a) |
| <b>ABHD17C</b> | <b>Alpha/beta hydrolase domain-containing protein 17B</b> | <0.01           | 72.3 (b)            | 7.6 (a)   | 11.3 (a)   |
| <b>CLIP3</b>   | <b>CAP-Gly domain-containing linker protein 3</b>         | 0.079           | 0.9 (a)             | 1.2 (a)   | 1.072 (a)  |
| <b>CLN1</b>    | <b>Palmitoyl-protein thioesterase 1</b>                   | <0.01           | 11.8 (a)            | 159.1 (b) | 151.3 (b)  |
| <b>GLUL</b>    | <b>Glutamine synthetase</b>                               | <0.01           | 333.5 (b)           | 28.9 (a)  | 39.1 (a)   |
| <b>GOLGA7</b>  | <b>Golgin subfamily A member 7</b>                        | <0.01           | 403.3 (b)           | 35.6 (a)  | 30.6 (a)   |
| <b>GOLGA7B</b> | <b>Golgin subfamily A member 7B</b>                       | <0.01           | 88.0 (b)            | 0.6 (a)   | 0.6 (a)    |
| <b>HHATL</b>   | <b>Protein-cysteine N-palmitoyltransferase HHAT-like</b>  | <0.01           | 3.2 (b)             | 0.5 (a)   | 0.6 (a)    |
| <b>LYPLA1</b>  | <b>Acyl-protein thioesterase 1</b>                        | <0.01           | 2.2 (a)             | 31.6 (b)  | 29.2 (b)   |
| <b>LYPLA2</b>  | <b>Acyl-protein thioesterase 2</b>                        | <0.01           | 9.8 (a)             | 99.6 (b)  | 101.7 (b)  |
| <b>LYPLAL1</b> | <b>Lysophospholipase-like protein 1</b>                   | <0.01           | 14.1 (b)            | 1.8 (a)   | 1.8 (a)    |
| <b>MAP6D1</b>  | <b>MAP6 domain-containing protein 1</b>                   | <0.01           | 1.3 (a)             | 5.9 (b)   | 5.2 (b)    |
| <b>PPT2</b>    | <b>Lysosomal thioesterase PPT2</b>                        | 0.11            | 99.2 (a)            | 90.9 (a)  | 67.7 (a)   |
| <b>SELK</b>    | <b>Selenoprotein K</b>                                    | <0.01           | 285.4 (b)           | 76.7 (a)  | 63.1 (a)   |
| <b>ZDHHC1</b>  | <b>Probable palmitoyltransferase ZDHHC1</b>               | <0.01           | 9.4 (b)             | 8.8 (b)   | 4.2 (a)    |
| <b>ZDHHC2</b>  | <b>Palmitoyltransferase ZDHHC2</b>                        | <0.05           | 6.3 (ab)            | 5.0 (a)   | 7.9 (b)    |
| <b>ZDHHC3</b>  | <b>Palmitoyltransferase ZDHHC3</b>                        | <0.01           | 64.0 (b)            | 19.8 (a)  | 16.9 (a)   |
| <b>ZDHHC4</b>  | <b>Probable palmitoyltransferase ZDHHC4</b>               | <0.01           | 44.7 (a)            | 110.1 (b) | 93.7 (b)   |
| <b>ZDHHC5</b>  | <b>Palmitoyltransferase ZDHHC5</b>                        | <0.01           | 37.8 (b)            | 19.3 (a)  | 17.9 (a)   |
| <b>ZDHHC6</b>  | <b>Palmitoyltransferase ZDHHC6</b>                        | <0.01           | 71.6 (b)            | 28.21 (a) | 22.8 (a)   |
| <b>ZDHHC7</b>  | <b>Palmitoyltransferase ZDHHC7</b>                        | <0.01           | 3.1 (b)             | 0.9 (a)   | 1.0 (a)    |
| <b>ZDHHC8</b>  | <b>Probable palmitoyltransferase ZDHHC8</b>               | 0.41            | 0.7 (a)             | 0.5 (a)   | 0.5 (a)    |
| <b>ZDHHC9</b>  | <b>Palmitoyltransferase ZDHHC9</b>                        | <0.01           | 5.6 (a)             | 42.2 (c)  | 28.3 (b)   |
| <b>ZDHHC12</b> | <b>Probable palmitoyltransferase ZDHHC12</b>              | 0.069           | 5.8 (a)             | 1.8 (a)   | 1.5 (a)    |
| <b>ZDHHC13</b> | <b>Probable palmitoyltransferase ZDHHC13</b>              | <0.01           | 38.0 (a)            | 3.1(b)    | 4.5 (b)    |
| <b>ZDHHC14</b> | <b>Probable palmitoyltransferase ZDHHC14</b>              | <0.01           | 0.7 (a)             | 91.2 (c)  | 68.3 (b)   |
| <b>ZDHHC15</b> | <b>Palmitoyltransferase ZDHHC15</b>                       | 0.391           | 0.26 (a)            | 2.546 (a) | 0.7 (a)    |
| <b>ZDHHC16</b> | <b>Palmitoyltransferase ZDHHC16</b>                       | <0.01           | 82.8 (b)            | 54.6 (a)  | 42.7 (a)   |
| <b>ZDHHC17</b> | <b>Palmitoyltransferase ZDHHC17</b>                       | <0.01           | 0.43 (a)            | 8.1 (b)   | 8.5 (b)    |
| <b>ZDHHC18</b> | <b>Palmitoyltransferase ZDHHC18</b>                       | <0.01           | 1.5 (b)             | 0.7 (a)   | 0.6 (a)    |
| <b>ZDHHC19</b> | <b>Palmitoyltransferase ZDHHC19</b>                       | <0.01           | 5.6 (b)             | 2.3 (a)   | 2.2 (a)    |
| <b>ZDHHC20</b> | <b>Palmitoyltransferase ZDHHC20</b>                       | <0.05           | 3.7 (ab)            | 3.1 (a)   | 4.7 (b)    |
| <b>ZDHHC21</b> | <b>Palmitoyltransferase ZDHHC21</b>                       | <0.01           | 5.5 (a)             | 21.6 (c)  | 11.7 (b)   |
| <b>ZDHHC22</b> | <b>Palmitoyltransferase ZDHHC22</b>                       | <0.01           | 0.2 (a)             | 0.4 (b)   | 0.5 (b)    |
| <b>ZDHHC23</b> | <b>Palmitoyltransferase ZDHHC23</b>                       | <0.01           | 0.9 (b)             | 0.6 (a)   | 0.8 (a)    |
| <b>ZDHHC24</b> | <b>Probable palmitoyltransferase ZDHHC24</b>              | 0.501           | 0.5 (a)             | 0.6 (a)   | 0.6 (a)    |

**Supplementary data, Table S3.** List of primers used for real time PCR analysis of gene expression in bovine follicular cells

| Gene         | Accession    | Primer | Séquence 5'-3'         | Amplicon (bp) | Efficiency (%) |
|--------------|--------------|--------|------------------------|---------------|----------------|
| <i>CLN1</i>  | NM_174154    | fw     | TTACGGCTGTCCTCCTCTGA   | 293           | 99.4           |
|              |              | rev    | AAGGGACAGGTTTATCAAGGGT |               |                |
| <i>PPT2</i>  | NM_001035318 | fw     | GCAACTACTGGCATGACCCT   | 263           | 95.3           |
|              |              | rev    | CCCAAAAGAGTCCCGCAGAT   |               |                |
| <i>GAPDH</i> | NM_001034034 | fw     | TTCAACGGCACAGTCAAGG    | 119           | 100.3          |
|              |              | rev    | ACATACTCAGCACCAGCATCAC |               |                |
| <i>RPL19</i> | NM_001040516 | fw     | AATCGCCAATGCCAACTC     | 156           | 99.9           |
|              |              | rev    | CCCTTTCGTTACCTATACC    |               |                |
| <i>SDHA</i>  | NM_174178    | fw     | GCAGAACCTGATGCTTTGTG   | 185           | 89.2           |
|              |              | rev    | CGTAGGAGAGCGTGTGCTT    |               |                |

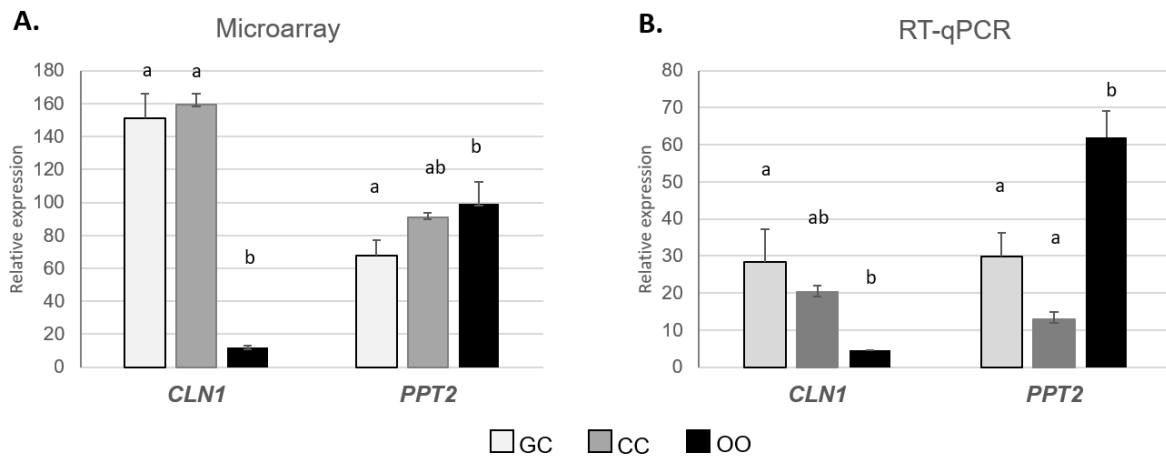

**Supplementary Figure S1.** Real time PCR validation of microarray gene expression analysis in bovine granulosa cells (GR), cumulus cells (CC) and oocytes. *CLN1* - palmitoyl-thioesterase 1 (PPT1), *PPT2* - palmitoyl-thioesterases 2. **A.** Relative expression of *CLN1* and *PPT2* genes as analysed by microarray (GSE149151). Histogram bars are the mean values of four independent samples +/- SEM. **B.** Relative expression of *CLN1* and *PPT2* analysed by real-time PCR. Histogram bars are the mean normalized values of six independent samples +/- SEM.
